# Supplementary material for: High-resolution fully coupled atmospheric–hydrological modeling: a cross-compartment regional water and energy cycle evaluation
Source: Copernicus journal article supplement (doi:10.5194/hess-24-2457-2020), 2020-05-13
Supplement: Supplementary file 1 [file hess-24-2457-2020-supplement.pdf]

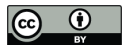

*Supplement of*

## **High-resolution fully coupled atmospheric–hydrological modeling: a cross-compartment regional water and energy cycle evaluation**

**Benjamin Fersch et al.**

*Correspondence to:* Benjamin Fersch (fersch@kit.edu)

The copyright of individual parts of the supplement might differ from the CC BY 4.0 License.

# Supplementary material

Additional tables and figures that were omitted in the manuscript for brevity.

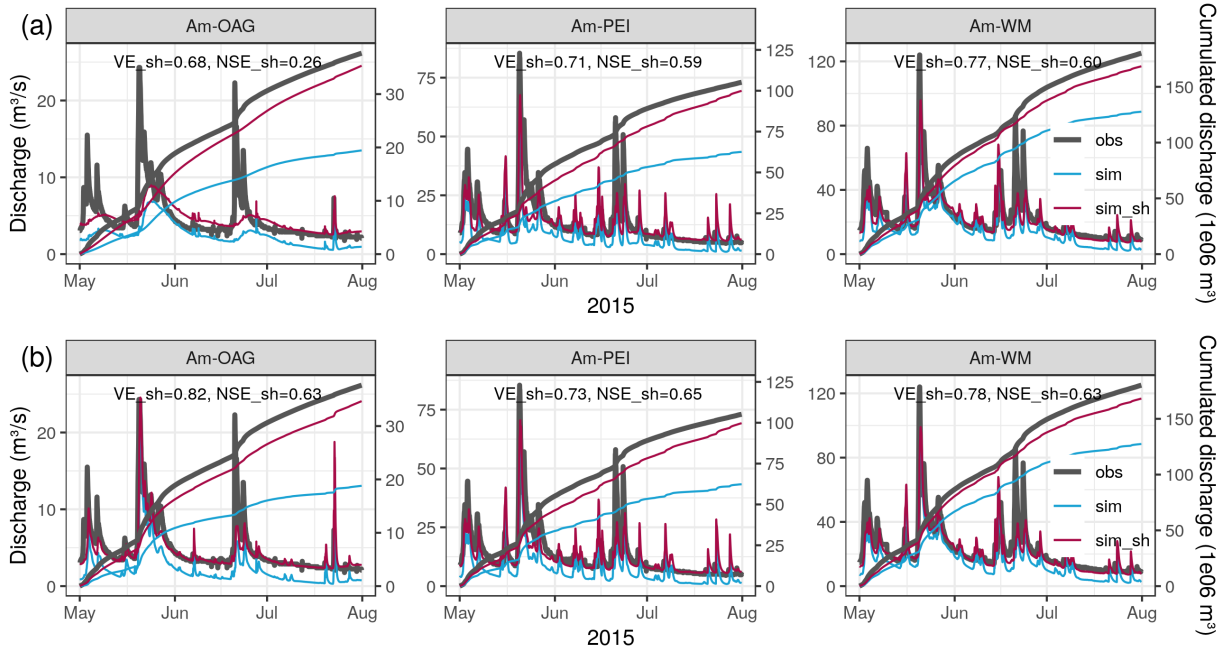

Figure S1: Simulated and observed discharge for the calibration period (01 May–31 July). (a) Uniform soil layers throughout domain, (b) reduced soil layer thicknesses for slopes  $> 50\%$ .

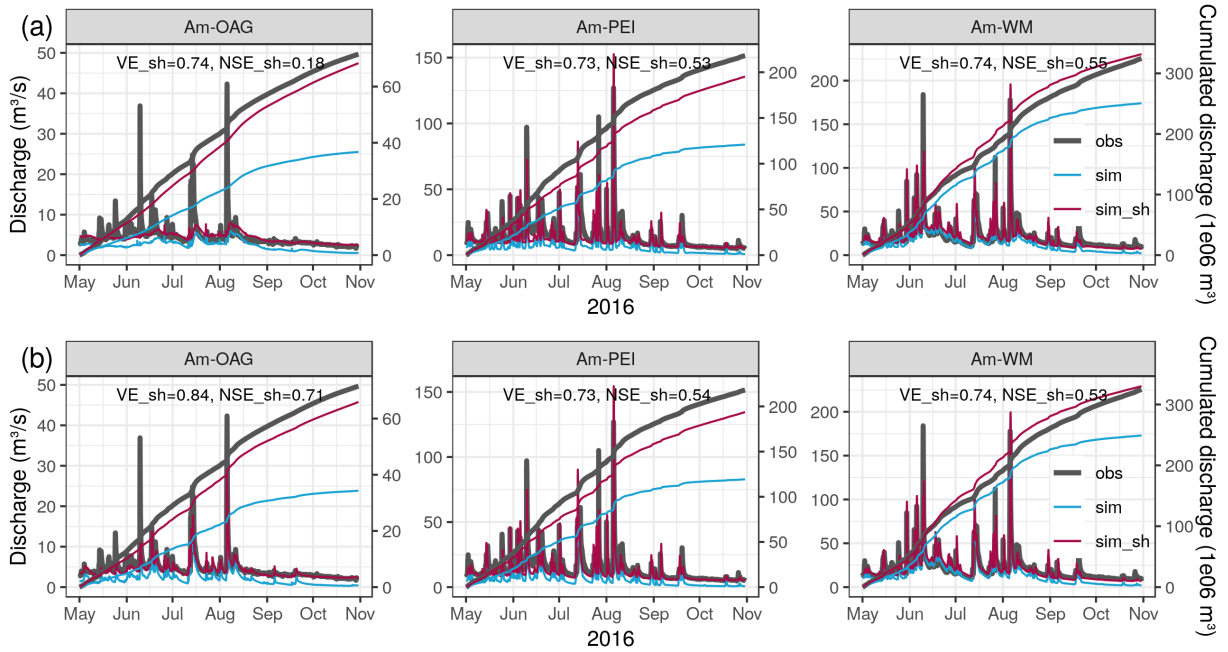

Figure S2: Simulated and observed discharge for the validation period (1 May–31 October 2016). (a) Uniform soil layers throughout domain, (b) reduced soil layer thicknesses for slopes  $> 50\%$ .

Table S1: Performance measures for total absorbed shortwave radiation ( $\text{W m}^{-2}$ ), simulations vs. observations for June to October 2016.

| Station | Model    | $r^2$ | ME    | MAE   |
|---------|----------|-------|-------|-------|
| DE-Fen  | WRF_SA   | 0.76  | 48.37 | 68.61 |
|         | WRF-H_FC | 0.77  | 49.51 | 68.27 |
| DE-RbW  | WRF_SA   | 0.73  | 47.65 | 71.44 |
|         | WRF-H_FC | 0.72  | 46.14 | 70.89 |
| DE-Gwg  | WRF_SA   | 0.66  | 68.16 | 88.95 |
|         | WRF-H_FC | 0.65  | 68.64 | 89.76 |

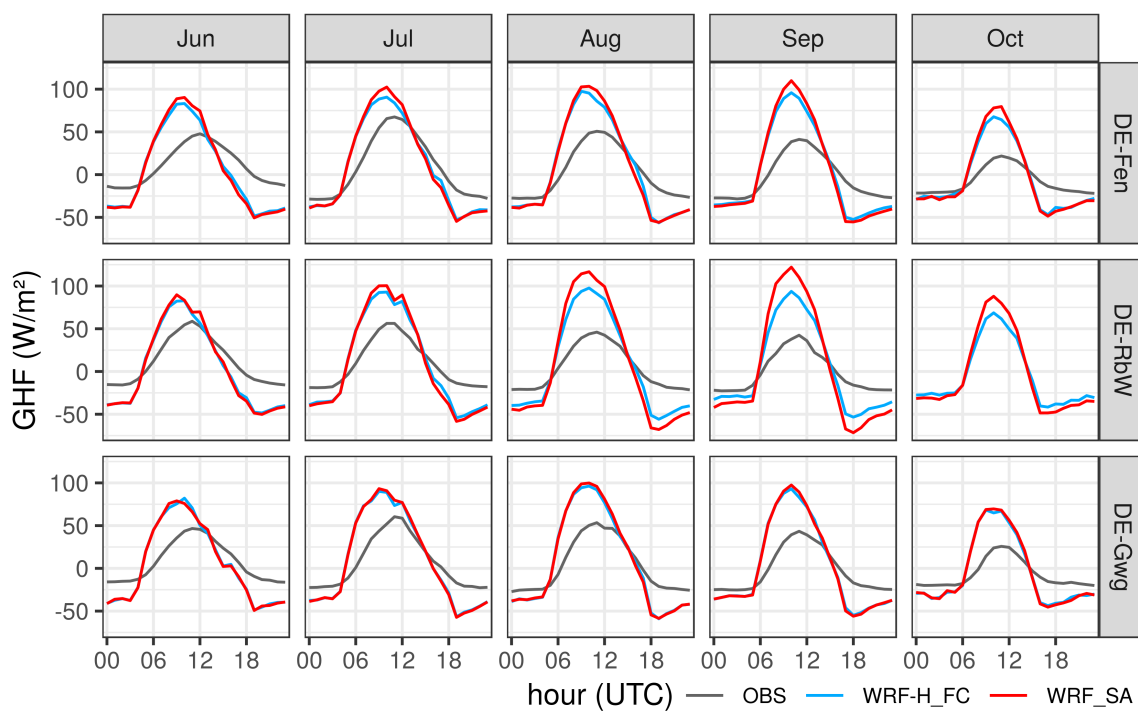

Figure S3: Mean diurnal cycles of simulated and observed ground-heat flux for the months June to October 2016 at different TERENO Pre-Alpine Observatory sites.

Table S2: Performance measures for ground-heat flux ( $\text{W m}^{-2}$ ), simulations vs. observations for June to October 2016.

| Station | Model    | $r^2$ | ME    | MAE   |
|---------|----------|-------|-------|-------|
| DE-Fen  | WRF_SA   | 0.60  | 2.57  | 30.40 |
|         | WRF-H_FC | 0.62  | 1.99  | 27.32 |
| DE-RbW  | WRF_SA   | 0.61  | 0.19  | 36.49 |
|         | WRF-H_FC | 0.64  | -0.08 | 29.49 |
| DE-Gwg  | WRF_SA   | 0.57  | 2.32  | 29.89 |
|         | WRF-H_FC | 0.56  | 2.05  | 29.20 |

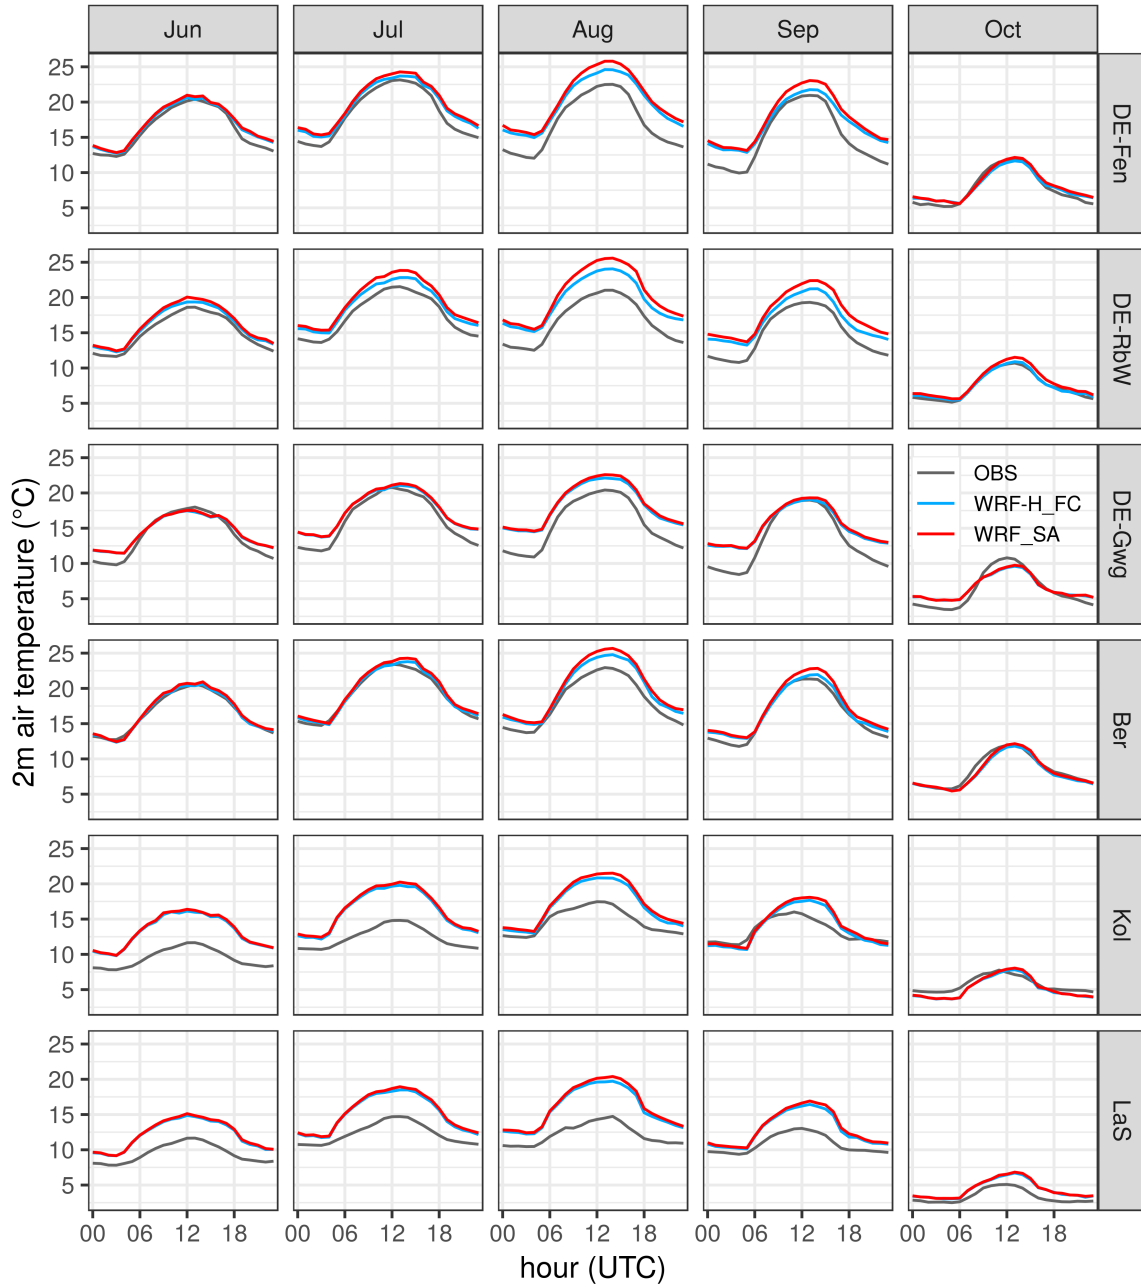

Figure S4: Mean diurnal cycles of simulated and observed 2m air temperature for the months June to October 2016 at different TERENO Pre-Alpine Observatory sites.

Table S3: Performance measures for 2 m air temperature (K), simulations vs. observations for June to October 2016.

| Station | Model    | $r^2$ | ME   | MAE  |
|---------|----------|-------|------|------|
| DE-Fen  | WRF_SA   | 0.81  | 1.76 | 2.64 |
|         | WRF-H.FC | 0.81  | 1.32 | 2.37 |
| DE-RbW  | WRF_SA   | 0.84  | 2.06 | 2.73 |
|         | WRF-H.FC | 0.84  | 1.41 | 2.24 |
| DE-Gwg  | WRF_SA   | 0.79  | 1.40 | 2.51 |
|         | WRF-H.FC | 0.79  | 1.27 | 2.45 |
| Ber     | WRF_SA   | 0.85  | 0.72 | 1.94 |
|         | WRF-H.FC | 0.86  | 0.38 | 1.82 |
| Kol     | WRF_SA   | 0.77  | 2.19 | 2.93 |
|         | WRF-H.FC | 0.77  | 1.94 | 2.77 |
| LaS     | WRF_SA   | 0.81  | 2.66 | 3.07 |
|         | WRF-H.FC | 0.81  | 2.45 | 2.91 |

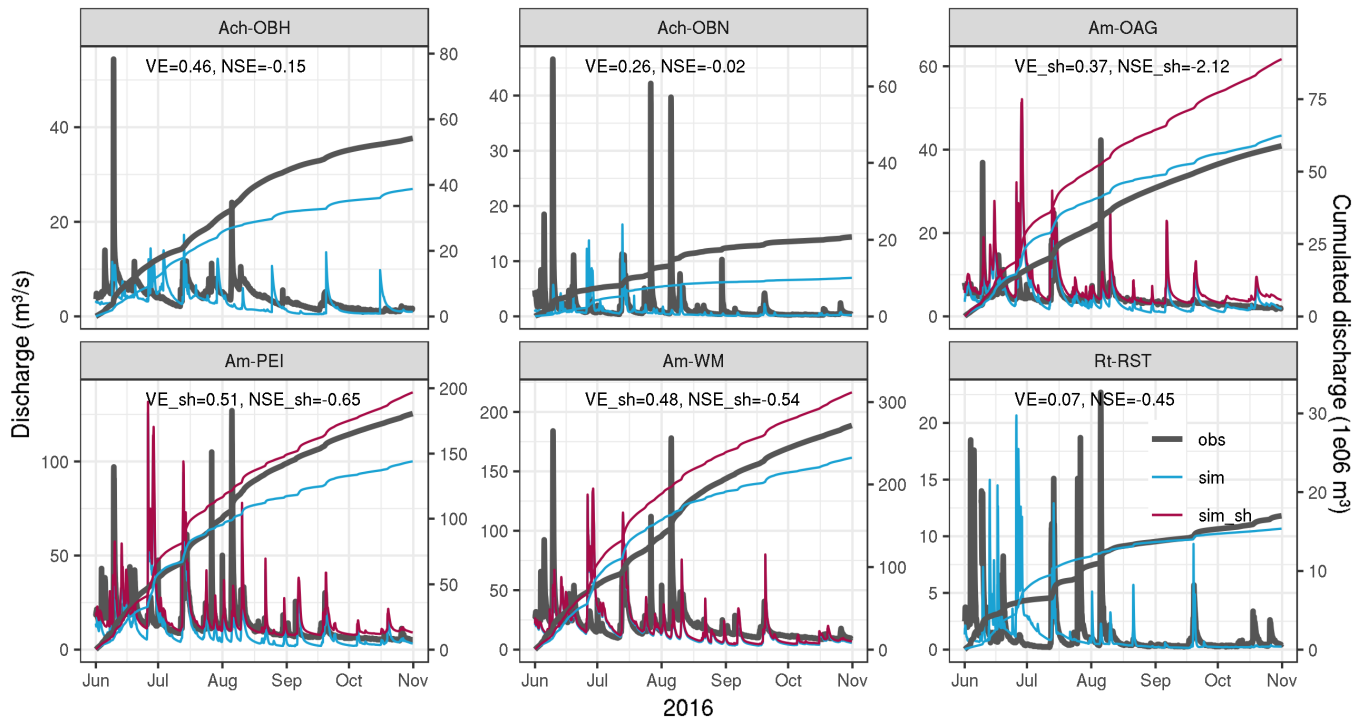

Figure S5: Subcatchment hydrographs for validation period (1 May–31 October 2016). Standard WRF-H.FC model output is printed in blue. Shifted (sh) hydrographs are shown in red. Shift amounts are listed in Tab. 3 of the main article.
